# Supplementary material for: Zeolite analogues based on oxysulfidometalate supertetrahedral clusters via coulombic interactions
Source: Royal Society of Chemistry journal article supplement (doi:10.1039/d3qi00360d), 2023-01-01
Supplement: d3qi00360d1.pdf [file d3qi00360d1.pdf]

## Electronic Supporting Information for

# **Zeolite analogs based on oxysulfidometalate supertetrahedral clusters via Coulombic interactions**

Ming-Bu Luo,<sup>a</sup> Jun-Li chen,<sup>a</sup> Shan-Lin Huang,<sup>a</sup> Xuechou Zhou,<sup>d</sup> Er-Xia Chen<sup>\*,a,b,c</sup> and  
Qipu Lin<sup>\*,a,c</sup>

<sup>a</sup>*State Key Laboratory of Structural Chemistry, Fujian Institute of Research on the  
Structure of Matter, Chinese Academy of Sciences, Fuzhou, Fujian 350002, China*

<sup>b</sup>*Fujian Science & Technology Innovation Laboratory for Optoelectronic Information  
of China, Fuzhou, Fujian 350108, China*

<sup>c</sup>*State Key Laboratory of Photocatalysis on Energy and Environment, Fuzhou  
University, Fuzhou, 350116, China*

<sup>d</sup>*School of Life Sciences, Fujian Agriculture and Forestry University, Fuzhou, Fujian  
350000, China*

\*Corresponding Author: Email: [exchen@fjirsm.ac.cn](mailto:exchen@fjirsm.ac.cn); [linqipu@fjirsm.ac.cn](mailto:linqipu@fjirsm.ac.cn)

## **Table of Contents**

**Section S1:** General Methods

**Section S2:** Synthetic Procedures

**Section S3:** Electrospray Ionization Mass Spectrometry (ESI–MS)

**Section S4:** Crystallographic Data

**Section S5:** Powder X-Ray Diffraction (PXRD)

**Section S6:** Fourier-Transform Infrared (FT–IR) Spectroscopy

**Section S7:** Thermogravimetric Analysis (TGA)

**Section S8:** Tauc Plots from Ultraviolet Visible (UV–Vis) Diffuse Reflection Spectroscopy (DRS)

**Section S9:** Scanning Electron Microscopy (SEM) and X-ray Energy Dispersive Spectroscopy (EDS)

**Section S10:** Proton Conduction

**Section S11:** References

## Section S1: General Methods

**Chemicals:** *n*-Butyltin trichloride ( $n\text{BuSnCl}_3$ , 98%), indium acetate hydrate ( $\text{In}(\text{OAc})_3 \cdot 6\text{H}_2\text{O}$ , 99.9%), zinc acetate dihydrate ( $\text{Zn}(\text{oac})_2 \cdot 2\text{H}_2\text{O}$ , 99.9%), lanthanum nitrate hexahydrate ( $\text{La}(\text{NO}_3)_3 \cdot 6\text{H}_2\text{O}$ , 99%), stannous chloride dihydrate ( $\text{SnCl}_2 \cdot 2\text{H}_2\text{O}$ , 98%), thiourea ( $(\text{NH}_2)_2\text{CS}$ , 99%), triethylene glycol (TEG, 98%), *N*-methyl-2-pyrrolidone (NMP, 98%), tetramethylguanidine (TMG, 99%), dibenzylamine (DBA, 99%), 1-methylpiperidine (MPI, 98%), 2-amino-1-butanol (98%) were acquired from Aladdin Chemical Reagent Shanghai. All chemicals were used as supplied without further purification.

**Instrumentation:** Energy dispersive spectroscopy (EDS) analysis was performed on scanning electron microscope (SEM) coupled with Oxford INCA system. Elemental analysis (EA) data was collected on a Vario EL-Cube instrument. Inductively coupled plasma optical emission spectroscopy (ICP–OES) was carried out on a Ultima-2 spectrometer device. The powder X-ray diffraction (PXRD) data of the crystals were collected on a Rigaku Mini Flex II diffractometer using  $\text{Cu K}\alpha$  radiation ( $\lambda = 1.54056 \text{ \AA}$ ) operated at 30 kV and 10 mA under ambient conditions. The solid-state ultraviolet visible (UV–Vis) diffuse reflection spectroscopy (DRS) were recorded at room temperature with  $\text{BaSO}_4$  as a reference substance (100% reflectance) on a PerkinElmer Lambda-950 UV spectrophotometer and scanned at 250–800 nm. Thermo gravimetric analysis (TGA) was performed on a Mettler Toledo TGA/SDTA 851e analyzer in air atmosphere with a heating rate of  $10 \text{ }^\circ\text{C min}^{-1}$  under  $\text{N}_2$  flow from room temperature to  $800 \text{ }^\circ\text{C}$ . Fourier transform infrared (FT–IR) spectra were acquired using KBr pellets on a Nicolet Magna 750 FT–IR spectrometer between  $400\text{--}4000 \text{ cm}^{-1}$  in attenuated total reflection. Electrospray ionization-mass (ESI-MS) measurements were performed on an Impact II UHR-TOF (Bruker).

**Crystallographic Characterization:** The single crystal X-ray diffraction measurement was performed on a ROD, Synergy Custom system, HyPix diffractometer with micro-focus metaljet  $\text{K}\alpha$  ( $\lambda = 1.34050 \text{ \AA}$ ) radiation at 100 K. The structures were solved by direct method and refined by full-matrix least-squares on  $F^2$  using the olex2.<sup>1</sup> All the

non-hydrogen atoms are refined anisotropically. Contributions to scattering due to disordered solvent molecules were removed using the SQUEEZE routine of PLATON.<sup>2</sup> The structures were then refined again using the data generated.

**Impedance analysis:** The samples were dried at 60 °C in oven overnight and then put into a home-made mold with a diameter of 0.4 cm to get circular pellets, whose thickness was measured by a micrometer screw. Two sides of the pellets were smeared by silver colloid, and further connected by copper wires, respectively. The proton conductivities were evaluated by using a Zahner (IM6) electrochemical impedance spectrometer, over a frequency range from 100 mHz to 10 MHz, under varying temperatures (room temperature to 50 °C) and different relative humidity (75% to 98% RH). The proton conductivity was calculated by using the following equation

$$\sigma = \frac{l}{SR}$$

Where  $\sigma$  is the conductivity ( $S\ cm^{-1}$ ),  $l$  is the thickness (cm) of the pellet,  $S$  is the cross-sectional area ( $cm^2$ ) of the pellet and  $R$  is the bulk resistance ( $\Omega$ ). The activation energy ( $E_a$ ) was calculated from the following equation

$$\ln \sigma_T = \ln \sigma_0 - \frac{E_a}{RT}$$

Where  $\sigma$  is the conductivity ( $S\ cm^{-1}$ ),  $K$  is the Boltzmann constant ( $eV\ K^{-1}$ ) and  $T$  is the temperature (K).

## Section S2: Synthetic Procedures

### Synthesis of T3-MEP $[\text{Sn}_{10}\text{S}_{20}\text{O}_4] \cdot 1.5\text{LaCl}_3 \cdot [\text{C}_5\text{H}_9\text{NOH}]_8 \cdot [\text{C}_5\text{H}_9\text{NO}]_2 \cdot [\text{C}_6\text{H}_{14}\text{O}_4]_2$

$n\text{BuSnCl}_3$  (0.1 mL),  $\text{SnCl}_2 \cdot 2\text{H}_2\text{O}$  (0.35 mmol, 79.0 mg),  $\text{La}(\text{NO}_3)_3 \cdot 6\text{H}_2\text{O}$  (0.30 mmol, 129.9 mg), thiourea (2 mmol, 152.2 mg), NMP (3.0 mL), TEG (2.0 mL) were mixed in a 23-mL Teflon-lined stainless autoclave and stirred for 10 min. Then the vessel was sealed and heated at 120 °C for 8 days. Colorless octadecahedron-shaped crystals (yield: 62 mg, ca. 18.35% base on  $n\text{BuSnCl}_3$  and  $\text{SnCl}_2 \cdot 2\text{H}_2\text{O}$ ) with pure phase were obtained after 3 days in room temperature and washed with ethanol for several times. Experimental EA data: C 20.15%, H 3.3%, N 3.89%, S 16.66%; calculated EA data: C 20.9%, H 3.53%, N 3.93%, S 18.01%. Experimental ICP data: Sn 33.65%, La 5.47%; calculated ICP data: Sn 33.34%, La 5.85%; IR:  $\nu$  ( $\text{cm}^{-1}$ ) = 2925(w), 2868(w), 1643(s), 1512(m), 1461(w), 1410(w), 1311(w), 1260(w), 1227(w), 1175(w), 1124(w), 1069(w), 989(w), 932(w), 895(w), 750(w), 666(w), 559(m), 465(w).

### Synthesis of T4-MTN $[\text{Sn}_4\text{In}_{12}\text{Zn}_4\text{S}_{31}\text{O}_4][\text{C}_5\text{H}_{14}\text{N}_2\text{O}]_4 \cdot [\text{C}_5\text{H}_{14}\text{N}_3]_2$

$n\text{BuSnCl}_3$  (10  $\mu\text{L}$ ),  $\text{In}(\text{OAc})_3 \cdot 6\text{H}_2\text{O}$  (0.20 mmol, 80.0 mg),  $\text{Zn}(\text{OAc})_2 \cdot 2\text{H}_2\text{O}$  (0.10 mmol, 22.0 mg), thiourea (3 mmol, 228 mg), TMG (1.25 mL), DBA (2.5 mL),  $\text{H}_2\text{O}$  (1 mL) were mixed in a 23-mL Teflon-lined stainless autoclave and stirred for 20 min. Then the vessel was sealed and heated at 120 °C for 7 days. Colorless or pale-yellow octahedral crystals (yield: 12 mg, ca. 20.63% base on  $n\text{BuSnCl}_3$ ) with pure phase were obtained by filtration after being washed with acetone and water for several times. Experimental EA data: C 9.95%, H 2.91%, N 4.81%, S 25.14%; calculated EA data: C 10.83%, H 2.17%, N 5.06%, S 25.63%. Experimental ICP data: Sn 10.46%, In 30.05%, Zn 4.68%; calculated ICP data: Sn 12.25%, In 35.54%, Zn 6.74%. IR:  $\nu$  ( $\text{cm}^{-1}$ ) = 3579(w), 3524(w), 3449(w), 3378(w), 2957(w), 2912(w), 2846(w), 2761(w), 1617(m), 1457(s), 1296(w), 1247(w), 1171(w), 1140(w), 1065(w), 1021(m), 815(m), 669(m), 503(s).

### Synthesis of T4-DIA $[\text{Sn}_4\text{In}_{12}\text{Zn}_4\text{S}_{31}\text{O}_4][\text{C}_6\text{H}_{14}\text{N}]_8 \cdot [\text{C}_4\text{H}_{13}\text{NO}]$

$n\text{BuSnCl}_3$  (10  $\mu\text{L}$ ),  $\text{In}(\text{OAc})_3 \cdot 6\text{H}_2\text{O}$  (0.20 mmol, 80.0 mg),  $\text{Zn}(\text{OAc})_2 \cdot 2\text{H}_2\text{O}$  (0.10 mmol, 22.0 mg), thiourea (3 mmol, 228 mg), MPI (2 mL), 2-amino-1-butanol (1 mL),  $\text{H}_2\text{O}$  (0.5 mL), were mixed in a 23-mL Teflon-lined stainless autoclave and stirred for 20 min.

Then the vessel was sealed and heated at 120 °C for 7 days. Colorless or pale-yellow octahedral crystals (yield: 34 mg, ca. 55.77% base on  $n\text{BuSnCl}_3$ ) with pure phase were obtained by filtration after being washed with ethanol for several times. Experimental EA data: C 16.59%, H 3.23%, N 2.655%, S 25.4%; calculated EA data: C 15.35%, H 2.85%, N 3.1%, S 24.4%. Experimental ICP data: Sn 10.4%, In 26.18%, Zn 4.58%; calculated ICP data: Sn 11.68%, In 33.9%; Zn 6.43%. IR:  $\nu$  ( $\text{cm}^{-1}$ ) = 2952(s), 2861(m), 2676(w), 2550(w), 2510(w), 2470(w), 1678(m), 1592(m), 1457(s), 1371(m), 1311(w), 1241(w), 1171(w), 1140(w), 1105(w), 1055(m), 1026(w), 994(w), 966(w), 943(w), 850(w), 689(w), 661(w), 592(w), 541(w), 502(w), 453(w).

**Synthesis of T4-LON  $[\text{Sn}_4\text{In}_{12}\text{Zn}_4\text{S}_{31}\text{O}_4][\text{C}_5\text{H}_{14}\text{N}_2\text{O}]_5$**

$n\text{BuSnCl}_3$  (10  $\mu\text{L}$ ),  $\text{In}(\text{OAc})_3 \cdot 6\text{H}_2\text{O}$  (0.20 mmol, 80.0 mg),  $\text{Zn}(\text{OAc})_2 \cdot 2\text{H}_2\text{O}$  (0.10 mmol, 22.0 mg), thiourea (3 mmol, 228 mg), TMG (1.25 mL),  $\text{H}_2\text{O}$  (0.5 mL), were mixed in a 23-mL Teflon-lined stainless autoclave and stirred for 20 min. Then the vessel was sealed and heated at 120 °C for 7 days. Colorless or pale-yellow hexagonal prism crystals (yield: 23 mg, ca. 40.74% base on  $n\text{BuSnCl}_3$ ) with pure phase were obtained by filtration after being washed with acetone and water for several times. Experimental EA data: C 8.82%, H 2.7%, N 3.24%, S 26.76%; calculated EA data: C 7.97%, H 1.86%, N 3.72%, S 26.36%. Experimental ICP data: Sn 11.35%, In 35.48%, Zn 5.99%. calculated ICP data: Sn 12.62%, In 36.61%, Zn 6.95%. IR:  $\nu$  ( $\text{cm}^{-1}$ ) = 3364 (w), 2952(w), 2912(w), 2847(w), 2747(w), 2405(w), 1652(s), 1457(s), 1381(m), 1246(w), 1171(w), 1140(w), 1076(w), 1045(w), 1015(m), 879(w), 815(m), 694(w), 664(w), 589(w), 504(w).

### Section S3: Electrospray Ionization Mass Spectrometry (ESI–MS)

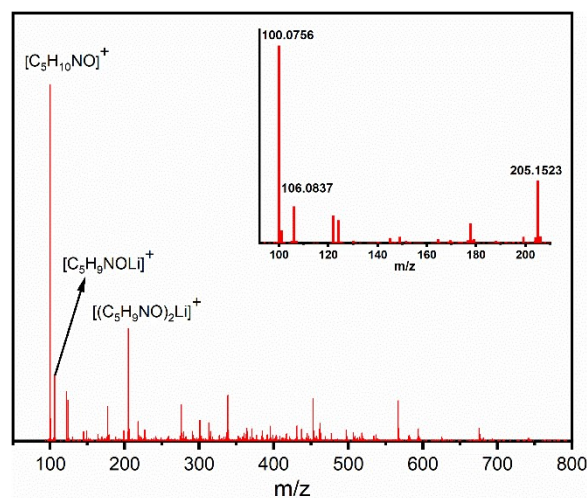

**Fig. S1** The positive-mode ESI-MS spectrum of T3-MEP in  $CH_3OH$  with addition of LiCl. The main peak at 100.0756 could be assignable to species of protonated *N*-methyl-2-pyrrolidone ( $H^+NMP$ ,  $[C_5H_{10}NO]^+$ ). The minor peaks at 106.0837 and 205.1523 could be assignable to species of  $[C_5H_9NOLi]^+$  and  $[(C_5H_9NO)_2Li]^+$ , respectively.

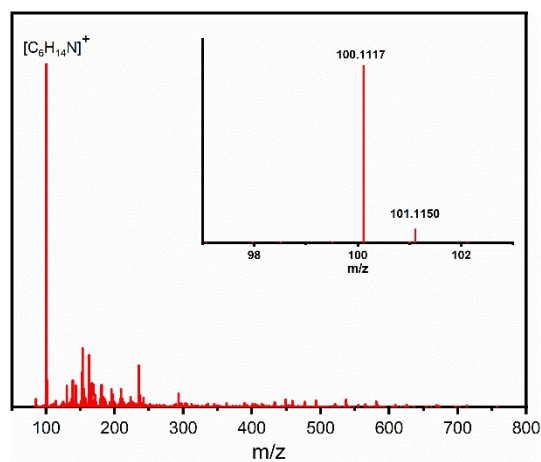

**Fig. S2** The positive-mode ESI-MS spectrum of T4-DIA in  $CH_3OH$ . The main peak at 100.1117 could be assignable to species of protonated 1-methylpiperidine ( $H^+MPI$ ,  $[C_6H_{14}N]^+$ ).

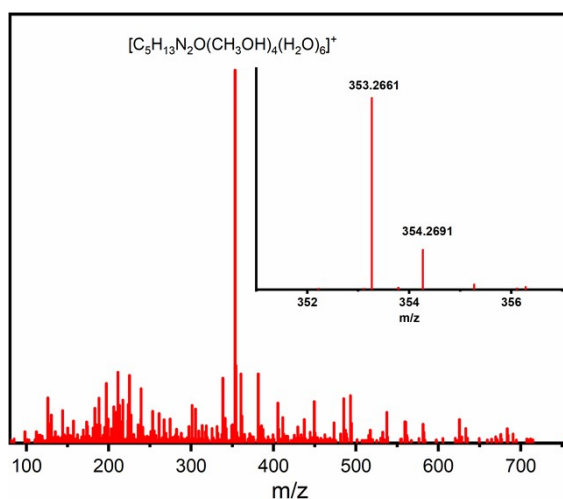

**Fig. S3** The positive-mode ESI-MS spectrum of T4-LON in CH<sub>3</sub>OH. The main peak at 353.2661 could be assignable to species of protonated tetramethylurea (H<sup>+</sup>TMU, where the TMU is derived from the hydrolysis of TMG used) coupled with CH<sub>3</sub>OH and H<sub>2</sub>O (i.e., [C<sub>5</sub>H<sub>13</sub>N<sub>2</sub>O(CH<sub>3</sub>OH)<sub>4</sub>(H<sub>2</sub>O)<sub>6</sub>]<sup>+</sup>).

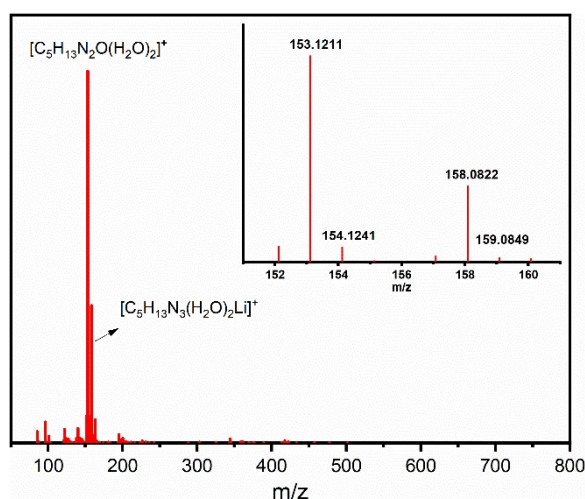

**Fig. S4** The positive-mode ESI-MS spectrum of T4-MTN in CH<sub>3</sub>OH with addition of LiCl. The main peak at 153.1211 could be assignable to species of protonated tetramethylurea (H<sup>+</sup>TMU, where the TMU is derived from the hydrolysis of TMG used) coupled with H<sub>2</sub>O (i.e., [C<sub>5</sub>H<sub>13</sub>N<sub>2</sub>O(H<sub>2</sub>O)<sub>2</sub>]<sup>+</sup>). The minor peak at 158.0822 could be assignable to species of protonated tetramethylguanidine (H<sup>+</sup>TMG) with Li<sup>+</sup> and H<sub>2</sub>O (i.e., [C<sub>5</sub>H<sub>13</sub>N<sub>3</sub>(H<sub>2</sub>O)<sub>2</sub>Li]<sup>+</sup>).

## Section S4: Crystallographic Data

**Table S1** Lattice parameters of tin-based oxychalcogenide clusters by SCXRD

| Compound Name          | T3-MEP       | T4-DIA      | T4-LON     | T4-MTN     |
|------------------------|--------------|-------------|------------|------------|
| $a/\text{\AA}$         | 50.5840(2)   | 31.1300(16) | 41.1511(8) | 80.4375(6) |
| $b/\text{\AA}$         | 50.5840(2)   | 31.1300(16) | 41.1511(8) | 80.4375(6) |
| $c/\text{\AA}$         | 50.5840(2)   | 31.1300(16) | 36.6354(9) | 80.4375(6) |
| $\alpha/^\circ$        | 90           | 90          | 90         | 90         |
| $\beta/^\circ$         | 90           | 90          | 90         | 90         |
| $\gamma/^\circ$        | 90           | 90          | 120        | 90         |
| Volume $/\text{\AA}^3$ | 129431.4 (9) | 30167(3)    | 53727(2)   | 520446(7)  |

**Table S2** Calculation of void ratio and surface area of tin-based oxychalcogenide clusters by PLATON and Materials Studio

| Compound Name                   | T3-MEP  | T4-DIA  | T4-LON  | T4-MTN  |
|---------------------------------|---------|---------|---------|---------|
| Void ratio/ %                   | 73      | 66.4    | 60.7    | 64.8    |
| surface area $/m^2\cdot g^{-1}$ | 1615.77 | 1409.85 | 1466.59 | 1491.98 |

**Table S3** Crystallographic data of tin-based oxychalcogenide clusters

| Compounds                                      | T3-MEP                                                            | T4-DIA                                                                          |
|------------------------------------------------|-------------------------------------------------------------------|---------------------------------------------------------------------------------|
| CCDC#                                          | 2241505                                                           | 2241506                                                                         |
| Empirical formula                              | O <sub>92</sub> S <sub>460</sub> Sn <sub>230</sub>                | In <sub>12</sub> O <sub>4</sub> S <sub>31</sub> Sn <sub>4</sub> Zn <sub>4</sub> |
| Formula weight                                 | 43518.3                                                           | 3171.94                                                                         |
| Temperature/K                                  | 100.01(10)                                                        | 100.00(10)                                                                      |
| Crystal system                                 | cubic                                                             | cubic                                                                           |
| Space group                                    | Pm-3n                                                             | Fd-3m                                                                           |
| a/Å                                            | 50.5840(2)                                                        | 31.1300(16)                                                                     |
| b/Å                                            | 50.5840(2)                                                        | 31.1300(16)                                                                     |
| c/Å                                            | 50.5840(2)                                                        | 31.1300(16)                                                                     |
| $\alpha/^\circ$                                | 90                                                                | 90                                                                              |
| $\beta/^\circ$                                 | 90                                                                | 90                                                                              |
| $\gamma/^\circ$                                | 90                                                                | 90                                                                              |
| Volume/Å <sup>3</sup>                          | 129431.4(15)                                                      | 30167(5)                                                                        |
| Z                                              | 2                                                                 | 8                                                                               |
| $\rho_{\text{calc}}/\text{cm}^3$               | 1.117                                                             | 1.397                                                                           |
| $\mu/\text{mm}^{-1}$                           | 13.945                                                            | 16.492                                                                          |
| F(000)                                         | 39192                                                             | 11488                                                                           |
| Crystal size/mm <sup>3</sup>                   | 0.08 × 0.08 × 0.08                                                | 0.2 × 0.2 × 0.2                                                                 |
| Radiation                                      | GaK $\alpha$<br>( $\lambda$ = 1.3405)                             | GaK $\alpha$<br>( $\lambda$ = 1.3405)                                           |
| 2 $\Theta$ range for data collection/ $^\circ$ | 4.802 to 104.98                                                   | 6.982 to 67.854                                                                 |
| Index ranges                                   | -28 ≤ h ≤ 59,<br>-27 ≤ k ≤ 45,<br>-54 ≤ l ≤ 43                    | -25 ≤ h ≤ 25,<br>-20 ≤ k ≤ 25,<br>-19 ≤ l ≤ 25                                  |
| Reflections collected                          | 161760                                                            | 7324                                                                            |
| Independent reflections                        | 19367 [R <sub>int</sub> = 0.1383,<br>R <sub>sigma</sub> = 0.0572] | 472 [R <sub>int</sub> = 0.0795,<br>R <sub>sigma</sub> = 0.0180]                 |
| Data/restraints/parameters                     | 19367/13/322                                                      | 472/0/33                                                                        |
| Goodness-of-fit on F <sup>2</sup>              | 1.09                                                              | 1.087                                                                           |
| Final R indexes [I ≥ 2 $\sigma$ (I)]           | R <sub>1</sub> = 0.1021,<br>wR <sub>2</sub> = 0.2859              | R <sub>1</sub> = 0.0792,<br>wR <sub>2</sub> = 0.2192                            |
| Final R indexes [all data]                     | R <sub>1</sub> = 0.1104,<br>wR <sub>2</sub> = 0.2922              | R <sub>1</sub> = 0.1104,<br>wR <sub>2</sub> = 0.2728                            |
| Largest diff. peak/hole / e Å <sup>-3</sup>    | 1.33/-1.95                                                        | 0.58/-0.32                                                                      |

| Compounds                                   | T4-LON                                                                          | T4-MTN                                                                          |
|---------------------------------------------|---------------------------------------------------------------------------------|---------------------------------------------------------------------------------|
| CCDC#                                       | 2241507                                                                         | 2241508                                                                         |
| Empirical formula                           | In <sub>12</sub> O <sub>4</sub> S <sub>31</sub> Sn <sub>4</sub> Zn <sub>4</sub> | In <sub>12</sub> O <sub>4</sub> S <sub>31</sub> Sn <sub>4</sub> Zn <sub>4</sub> |
| Formula weight                              | 3171.94                                                                         | 3171.94                                                                         |
| Temperature/K                               | 293(2)                                                                          | 293(2)                                                                          |
| Crystal system                              | hexagonal                                                                       | cubic                                                                           |
| Space group                                 | P6 <sub>3</sub> /m                                                              | Fd-3m                                                                           |
| a/Å                                         | 41.2494(6)                                                                      | 80.4375(6)                                                                      |
| b/Å                                         | 41.2494(6)                                                                      | 80.4375(6)                                                                      |
| c/Å                                         | 36.6629(7)                                                                      | 80.4375(6)                                                                      |
| α/°                                         | 90                                                                              | 90                                                                              |
| β/°                                         | 90                                                                              | 90                                                                              |
| γ/°                                         | 120                                                                             | 90                                                                              |
| Volume/Å <sup>3</sup>                       | 54024.7(19)                                                                     | 520446(12)                                                                      |
| Z                                           | 16                                                                              | 136                                                                             |
| ρ <sub>calc</sub> /cm <sup>3</sup>          | 1.56                                                                            | 1.376                                                                           |
| μ/mm <sup>-1</sup>                          | 18.418                                                                          | 16.251                                                                          |
| F(000)                                      | 22976                                                                           | 195296                                                                          |
| Crystal size/mm <sup>3</sup>                | 0.3 × 0.1 × 0.1                                                                 | 0.2 × 0.2 × 0.15                                                                |
| Radiation                                   | GaKα<br>(λ = 1.3405)                                                            | GaKα<br>(λ = 1.3405)                                                            |
| 2Θ range for data collection/°              | 17.738 to 112.528                                                               | 3.82 to 74.988                                                                  |
| Index ranges                                | -50 ≤ h ≤ 51,<br>-35 ≤ k ≤ 47,<br>-31 ≤ l ≤ 45                                  | -73 ≤ h ≤ 68,<br>-73 ≤ k ≤ 60,<br>-70 ≤ l ≤ 59                                  |
| Reflections collected                       | 134605                                                                          | 151443                                                                          |
| Independent reflections                     | 35436 [R <sub>int</sub> = 0.1210,<br>R <sub>sigma</sub> = 0.0721]               | 9210 [R <sub>int</sub> = 0.0937,<br>R <sub>sigma</sub> = 0.0287]                |
| Data/restraints/parameters                  | 35436/0/661                                                                     | 9210/53/408                                                                     |
| Goodness-of-fit on F <sup>2</sup>           | 1.053                                                                           | 1.179                                                                           |
| Final R indexes [I ≥ 2σ (I)]                | R <sub>1</sub> = 0.0586,<br>wR <sub>2</sub> = 0.1728                            | R <sub>1</sub> = 0.0870,<br>wR <sub>2</sub> = 0.2608                            |
| Final R indexes [all data]                  | R <sub>1</sub> = 0.0979,<br>wR <sub>2</sub> = 0.1916                            | R <sub>1</sub> = 0.1070,<br>wR <sub>2</sub> = 0.2888                            |
| Largest diff. peak/hole / e Å <sup>-3</sup> | 1.52/-0.92                                                                      | 0.76/-0.63                                                                      |

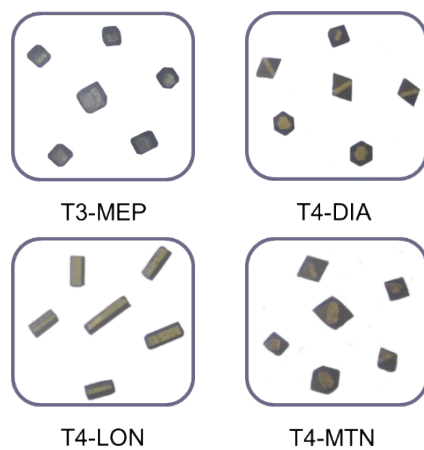

**Fig. S5** The photographs of the crystals

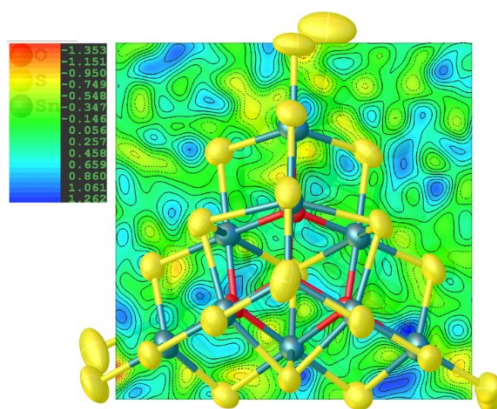

**Fig. S6** The the electron density difference map between two clusters in T3-MEP. The blue contours represent as  $H^+NMP$ .

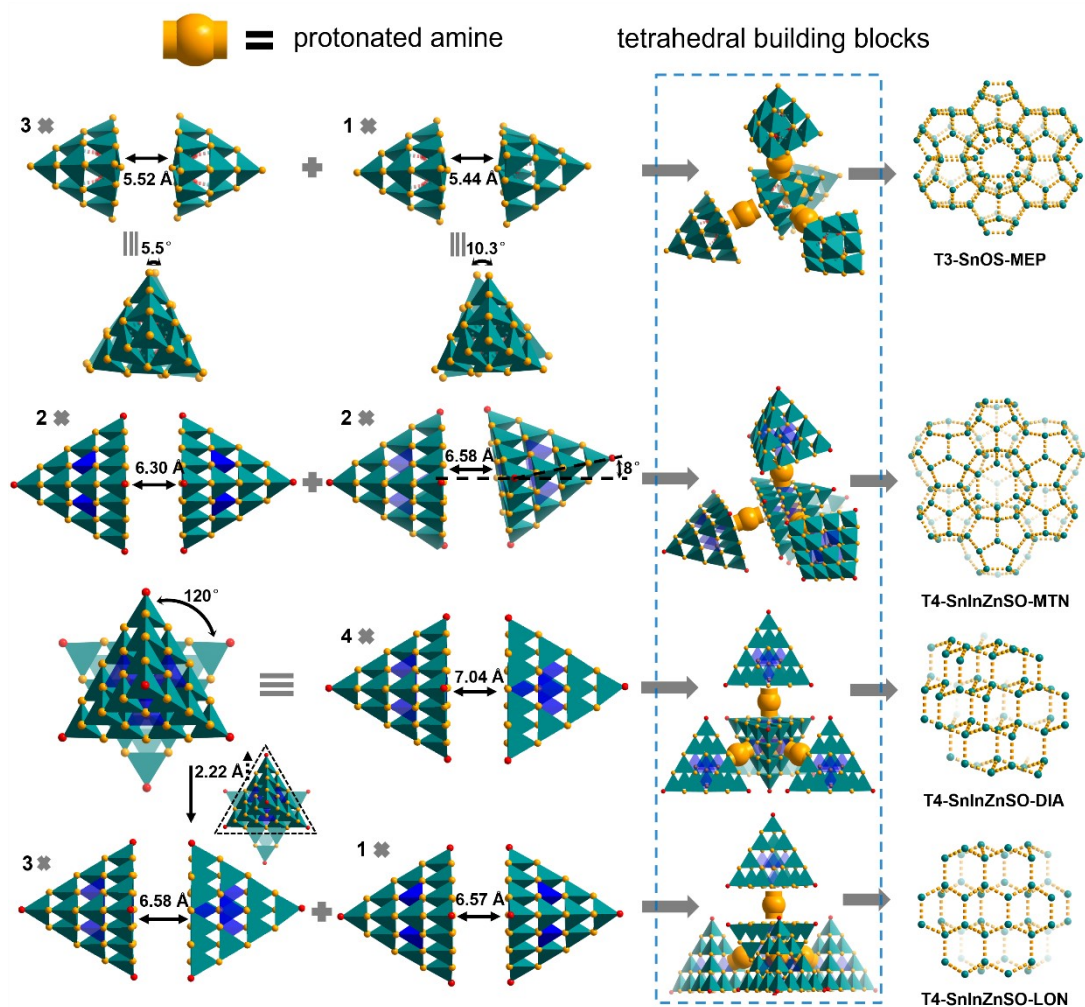

**Fig. S7** The different spatial arrangements between Tn clusters for assembling various topologies via coulombic interactions with the protonated organic amine templates.

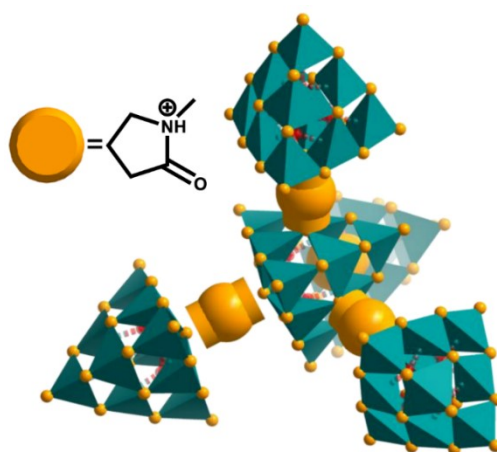

**Fig. S8** The linkage mode between oxido-filled-T3  $\{Sn_{10}O_4S_{20}\}$  clusters, each of which connects to four neighbors via the Coulombic interactions with the protonated organic amine templates of  $H^+NMP$ .

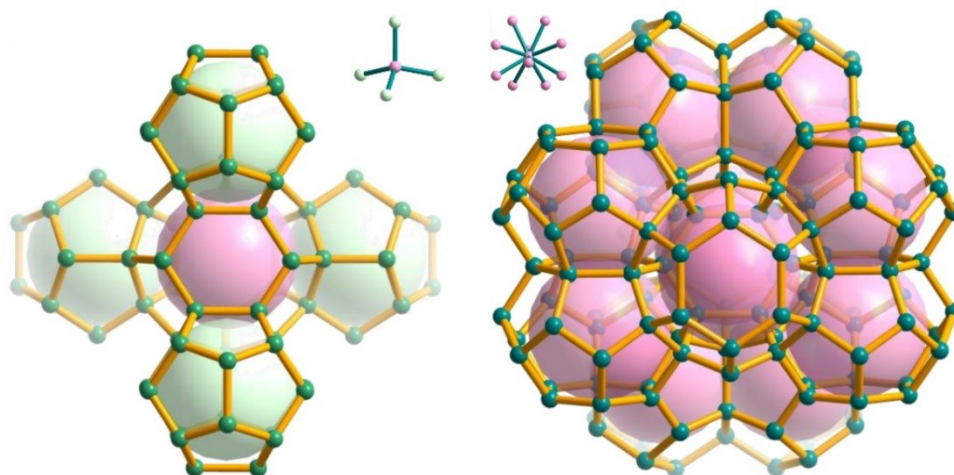

**Fig. S9** Each cage-A ( $6^25^{12}$ ) surrounded by 4 cage-B ( $5^{12}$ ) and 10 cage-A ( $6^25^{12}$ ) in T3-MEP.

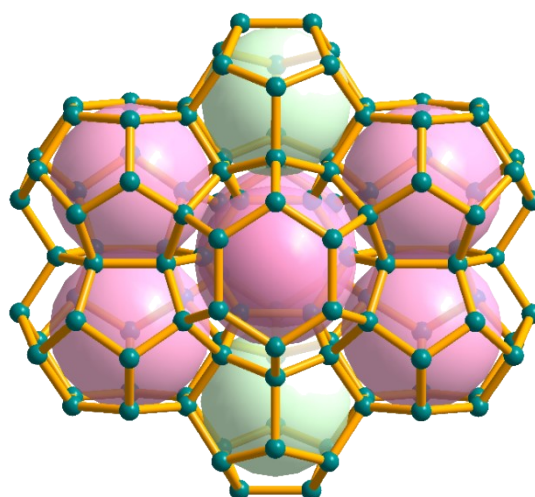

**Fig. S10** The  $\{Sn_{10}O_4S_{20}\}^{8-}$  anions are scattered in 3D space in an MEP zeotype in which each cluster is treated as a node.

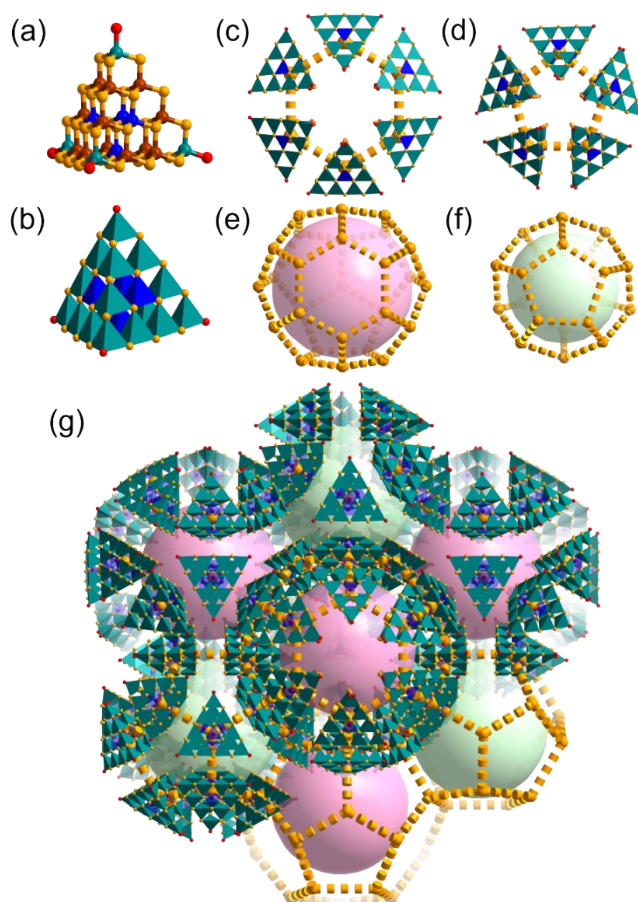

**Fig. S11** The crystal structure of T4-MTN (a,b) Discrete supertetrahedral T4- $[\text{Sn}_4\text{In}_{12}\text{Zn}_4\text{O}_4\text{S}_{31}]^{10-}$ . (c) hexagonal and (d) Pentagonal windows. (e)  $6^45^{12}$  cage-A and (f)  $5^{12}$  cage-B of topological representation. (g) MTN arrangement of T4 cluster anions and its simplified net. Sn, teal; In, brown; Zn, blue; S, gold; O, red.

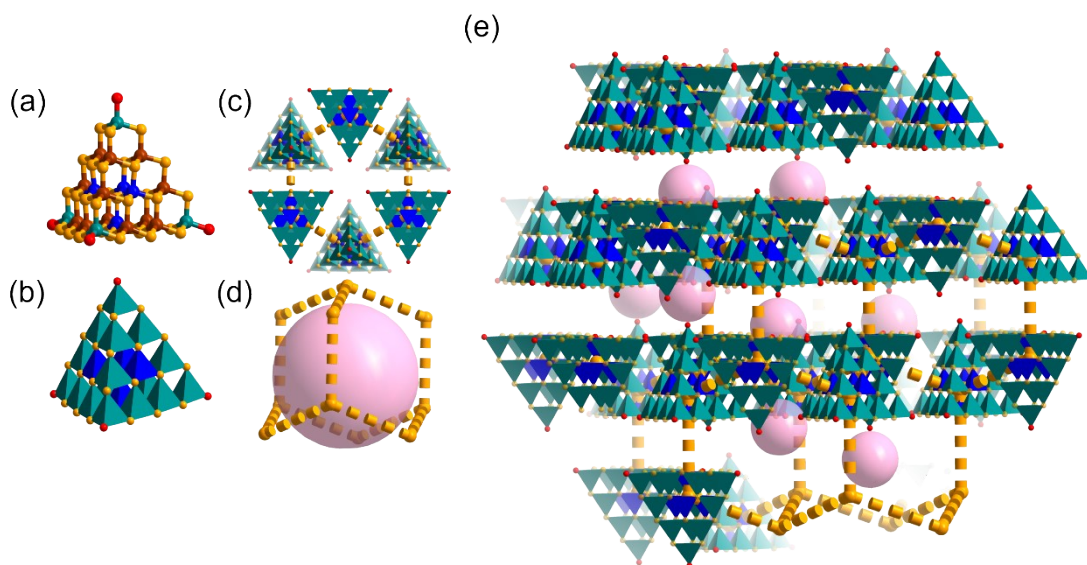

**Fig. S12** The crystal structure of T4-DIA. (a,b) Discrete supertetrahedral T4- $[\text{Sn}_4\text{In}_{12}\text{Zn}_4\text{O}_4\text{S}_{31}]^{10-}$ . (c) chair hexagonal windows. (d)  $6^4$  cage of topological representation. (e) diamond arrangement of T4 cluster anions and its simplified net. Sn, teal; In, brown; Zn, blue; S, gold; O, red.

blue; S, gold; O, red.

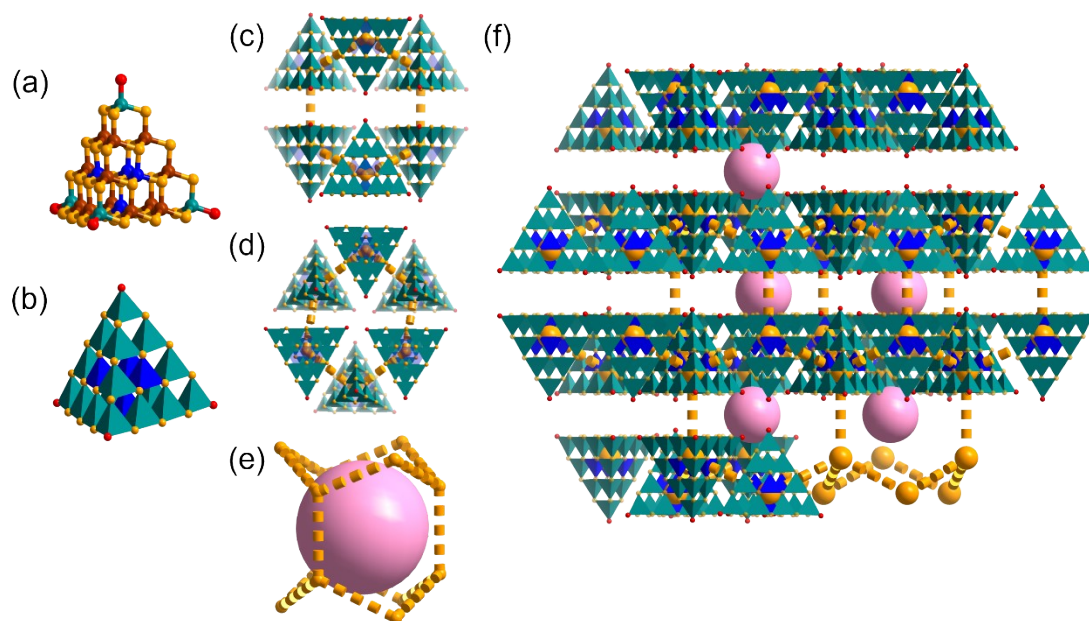

**Fig. S13** The crystal structure of T4-LON (a,b) Discrete supertetrahedral T4- $[\text{Sn}_4\text{In}_{12}\text{Zn}_4\text{O}_4\text{S}_{31}]^{10-}$ . (c) boat and chair (d) hexagonal windows. (d)  $6^5$  cage of topological representation. (g) lonsdaleite arrangement of T4 cluster anions and its simplified net. Sn, teal; In, brown; Zn, blue; S, gold; O, red.

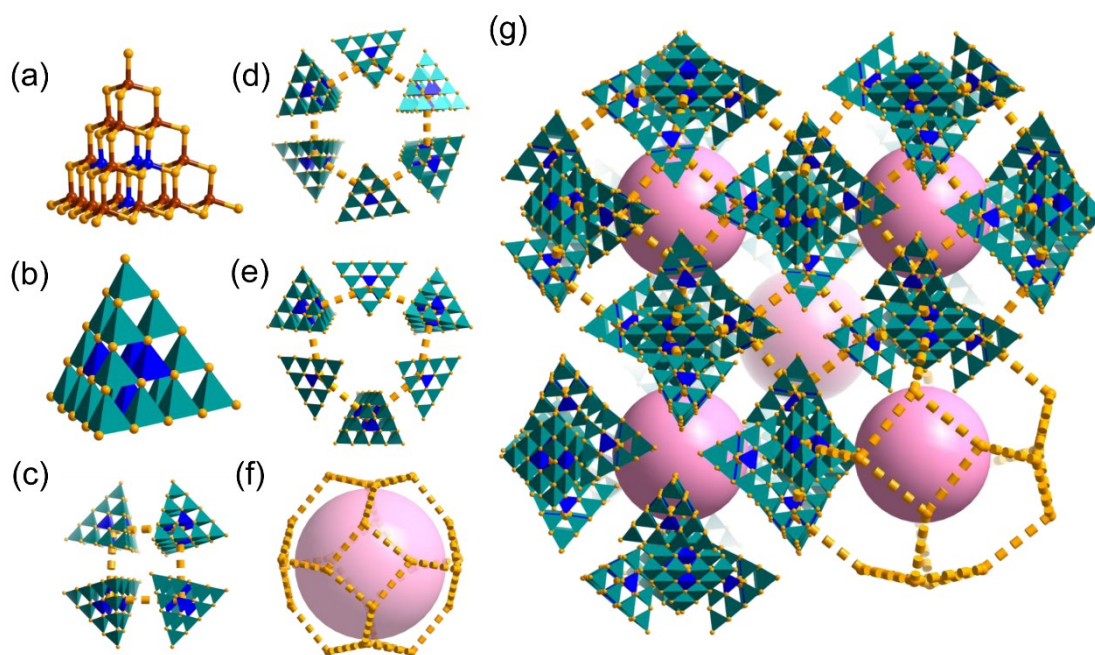

**Fig. S14** The crystal structure of T4-SOD (a,b) Discrete supertetrahedral T4- $[\text{In}_{16}\text{Zn}_4\text{S}_{35}]^{14-}$ . (c) four-membered (b) six-membered and (e) distorted six-membered ring of window (d) truncated octahedral cage of topological representation. (g) sodalite arrangement of T4 cluster anions and its simplified net. In, brown; Zn, blue; S, gold.

## Section S5: Powder X-Ray Diffraction (PXRD)

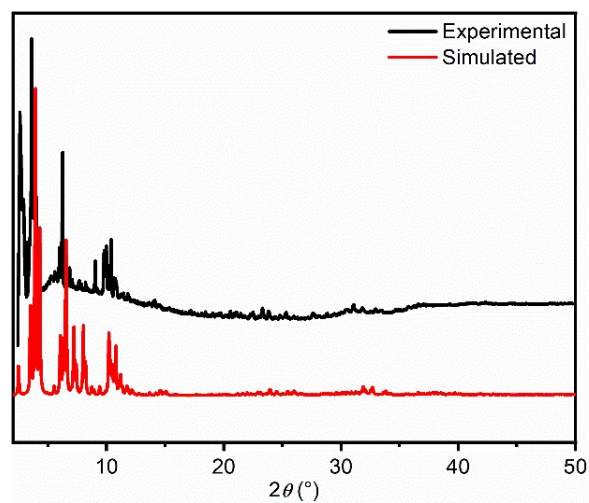

**Fig. S15** Experimental and simulated PXRD patterns of T3-MEP.

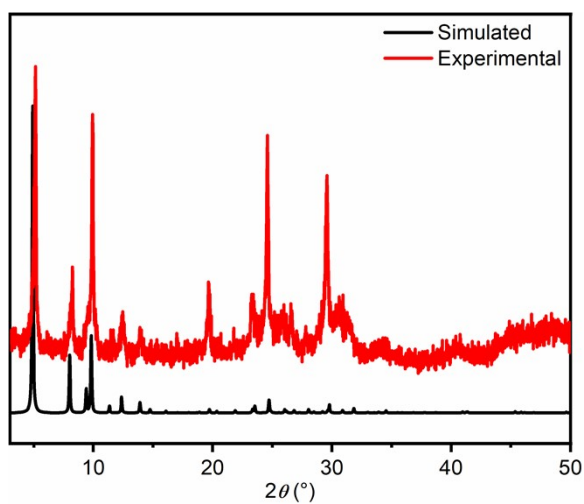

**Fig. S16** Experimental and simulated PXRD patterns of T4-DIA.

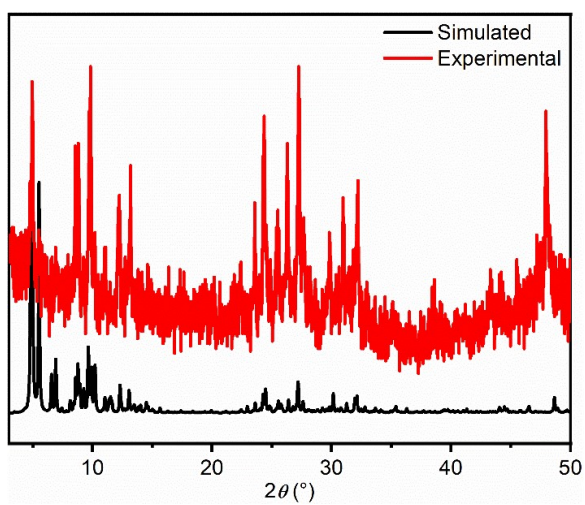

**Fig. S17** Experimental and simulated PXRD patterns of T4-LON.

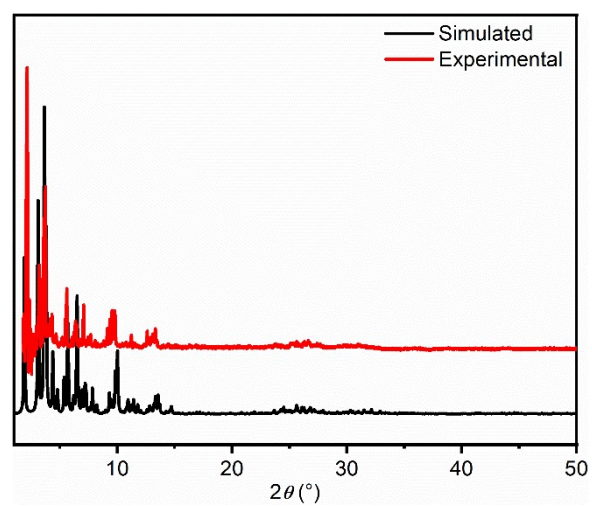

**Fig. S18** Experimental and simulated PXRD patterns of T4-MTN.

## Section S6: Fourier-Transform Infrared (FT-IR) Spectroscopy

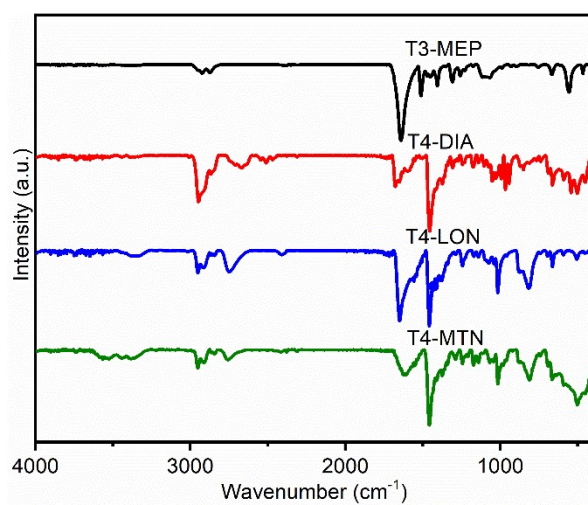

**Fig. S19** The FT-IR spectra of samples.

## Section S7: Thermogravimetric Analysis (TGA)

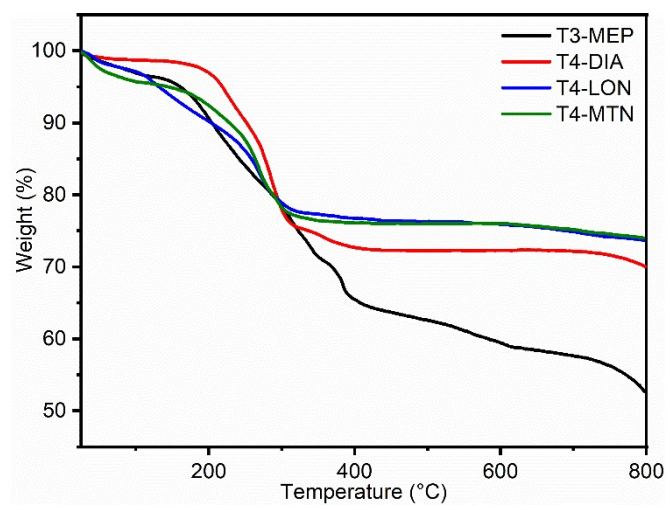

**Fig. S20** The TGA curves of samples.

**Section S8:** Tauc Plots from Ultraviolet Visible (UV–Vis) Diffuse Reflection Spectroscopy (DRS)

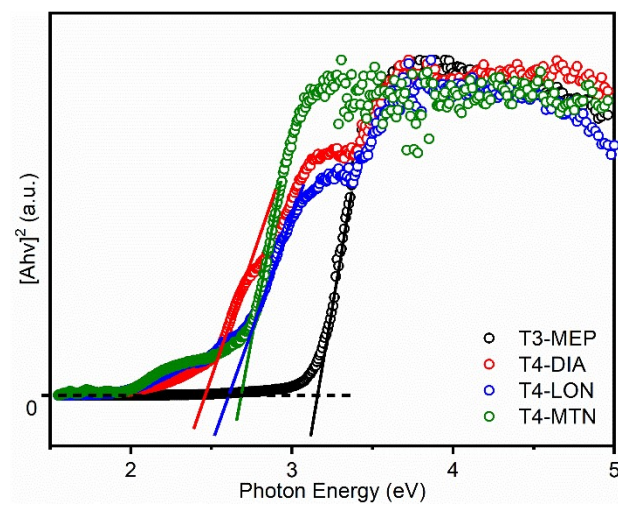

**Fig. S21** The tauc plots of samples.

## Section S9: Scanning Electron Microscopy (SEM) and X-ray Energy

### Dispersive Spectroscopy (EDS)

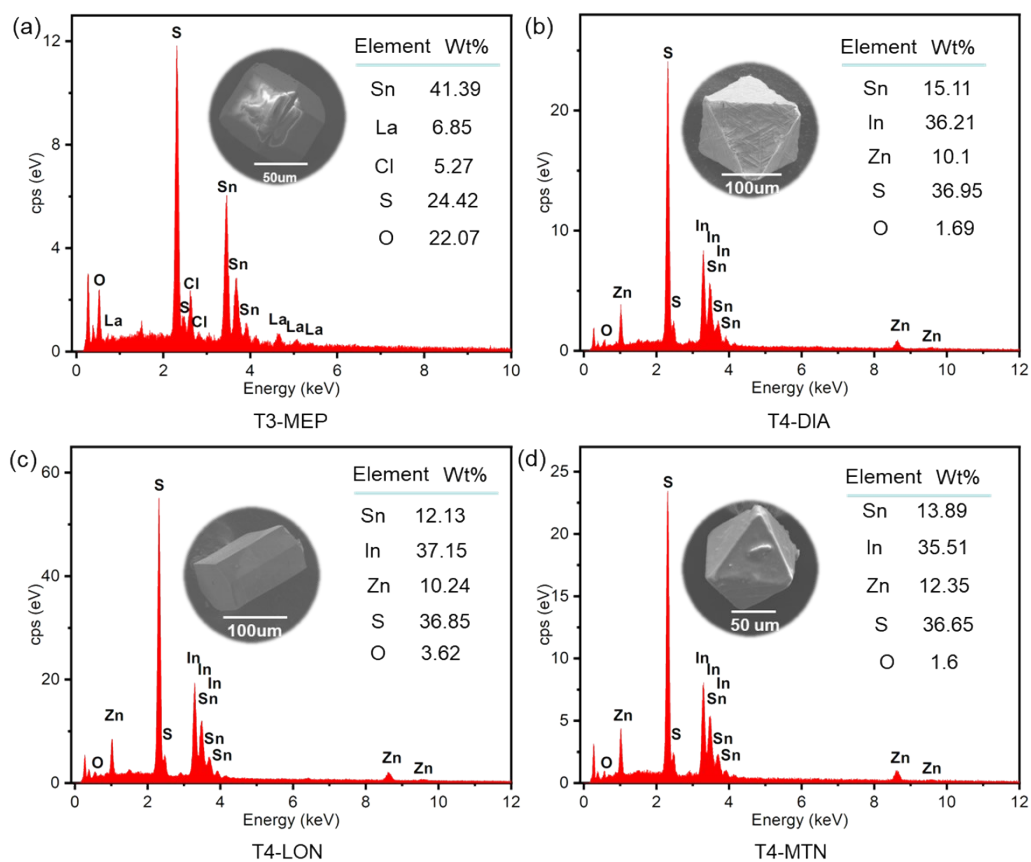

**Fig. S22** The SEM images and EDS spectra of samples.

## Section S10: Proton Conduction

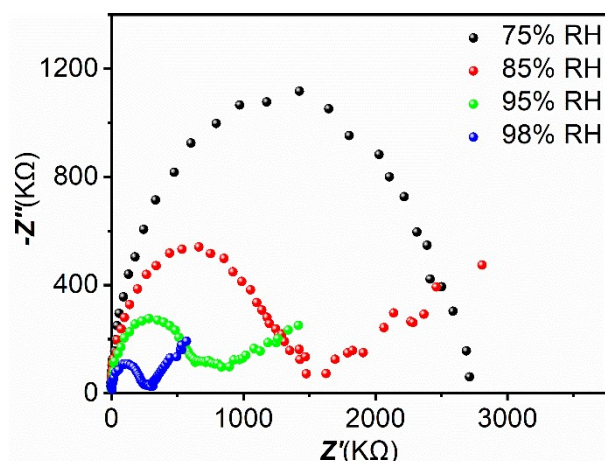

Fig. S23 Nyquist plots of T4-DIA at different RH at 25 °C.

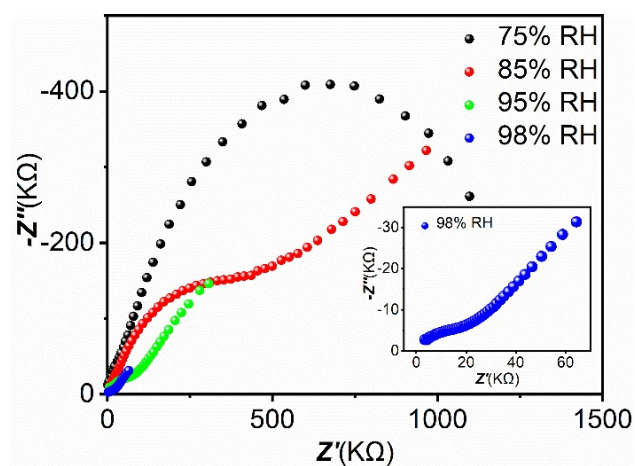

Fig. S24 Nyquist plots of T4-LON at different RH at 25 °C.

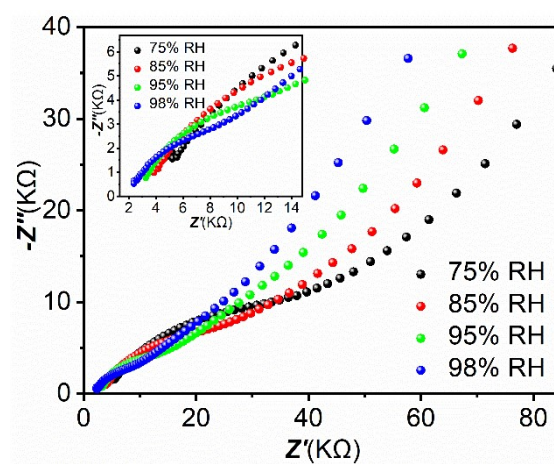

Fig. S25 Nyquist plots of T4-MTN at different RH at 25 °C.

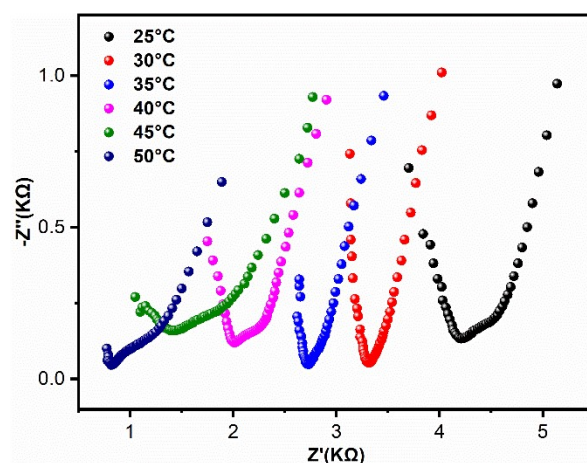

**Fig. S26** Nyquist plots of T3-MEP at different temperatures under 98% RH.

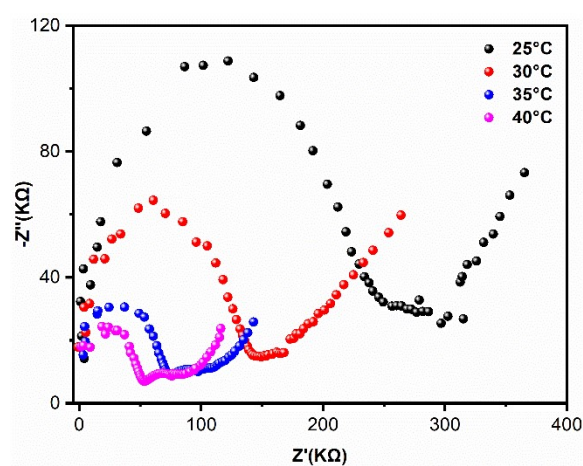

**Fig. S27** Nyquist plots of T4-DIA at different temperatures under 98% RH.

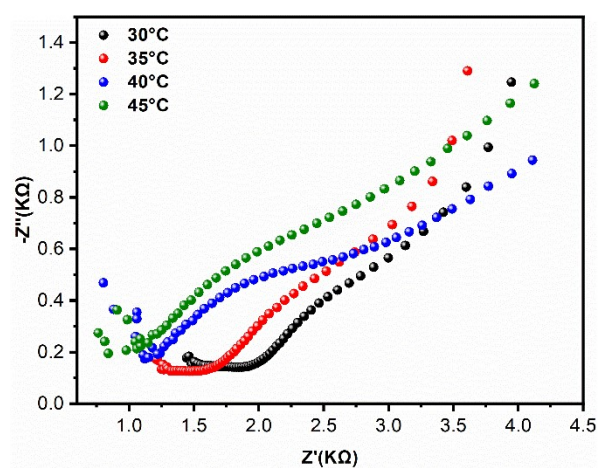

**Fig. S28** Nyquist plots of T4-LON at different temperatures under 98% RH.

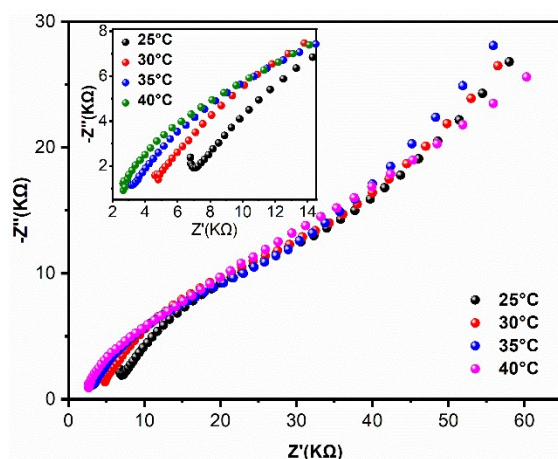

**Fig. S29** Nyquist plots of T4-MTN at different temperatures under 75% RH.

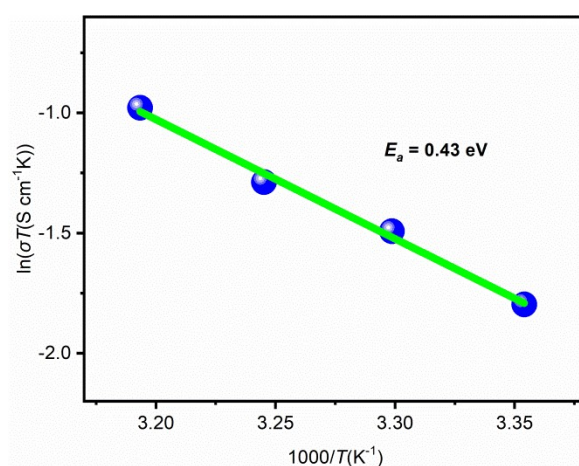

**Fig. S30** Arrhenius plots of proton conductivity on the temperature of T4-DIA under 98% RH.

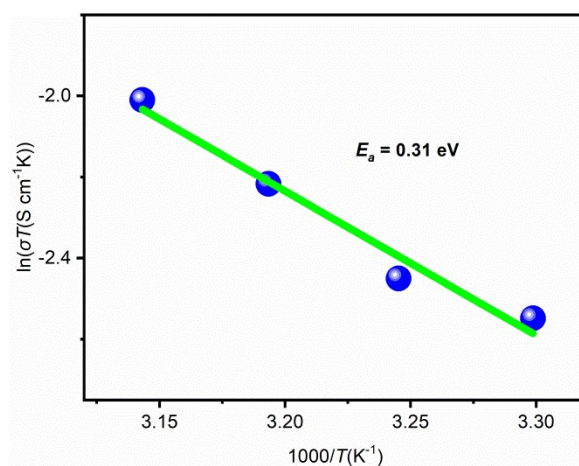

**Fig. S31** Arrhenius plots of proton conductivity on the temperature of T4-LON under 98% RH.

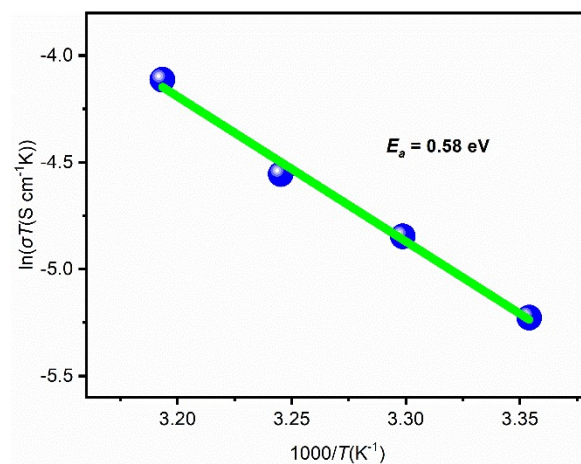

**Fig. S32** Arrhenius plots of proton conductivity on the temperature of T4-MTN under 75% RH.

## Section S11: References

- 1 (a) O. V. Dolomanov, L. J. Bourhis, R. J. Gildea, J. A. K. Howard and H. Puschmann, *J. Appl. Cryst.*, 2009, **42**, 339-341; (b) G. Sheldrick, *Acta Cryst.*, 2015, **C71**, 3-8; (c) L. J. Bourhis, O. V. Dolomanov, R. J. Gildea, J. A. K. Howard and H. Puschmann, *Acta Cryst.*, 2015, **A71**, 59-75.
- 2 P. van der Sluis and A. L. Spek, *Acta Cryst.*, 1990, **A46**, 194-201.
